# Supplementary material for: IL-12 and PD-1 peptide combination gene therapy for the treatment of melanoma
Source: PubMed Central journal article supplement — Mol Ther Nucleic Acids. 2024 Jul 16;35(3):102267. doi: 10.1016/j.omtn.2024.102267 (PMC11339250; doi:10.1016/j.omtn.2024.102267), 2024-07-16
Supplement: mmc1.pdf [file mmc1.pdf]

**OMTN, Volume 35**

**Supplemental information**

**IL-12 and PD-1 peptide combination gene  
therapy for the treatment of melanoma**

**Loree C. Heller, Guilan Shi, Amanda Sales Conniff, Julie Singh, Samantha Mannarino, Jody Synowiec, and Richard Heller**

**A. Melan-A**

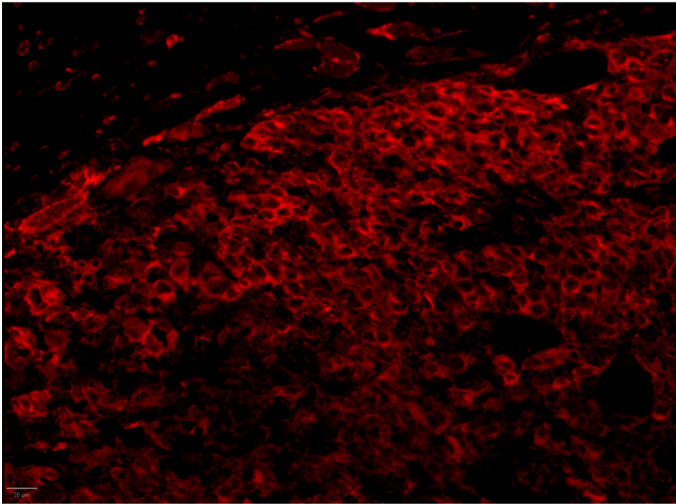

**B. CD8a**

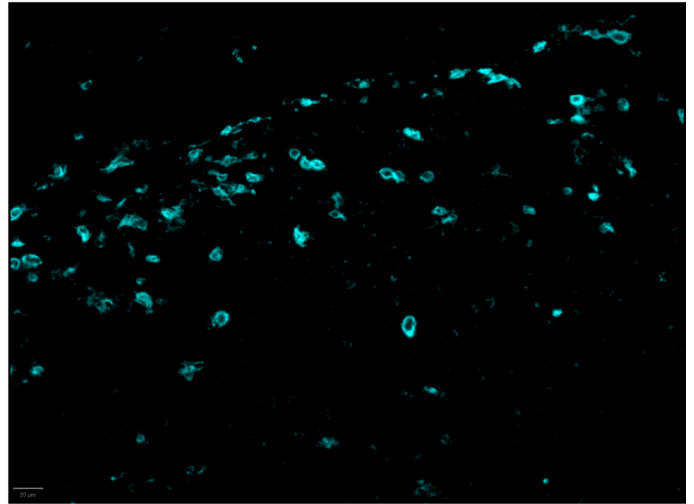

**C. PD-1**

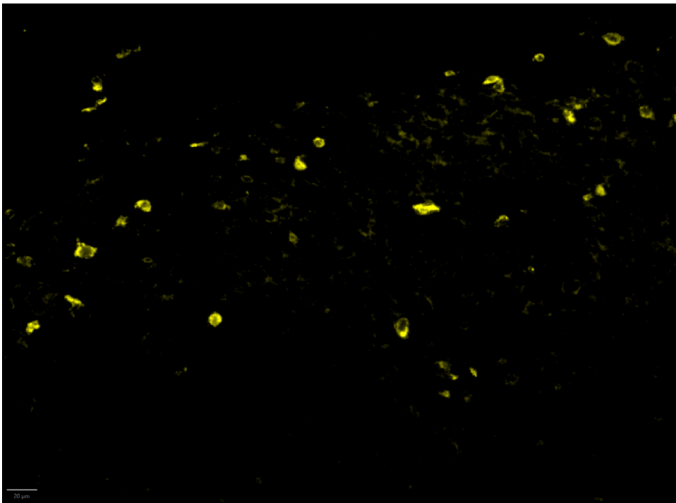

**D. Composite**

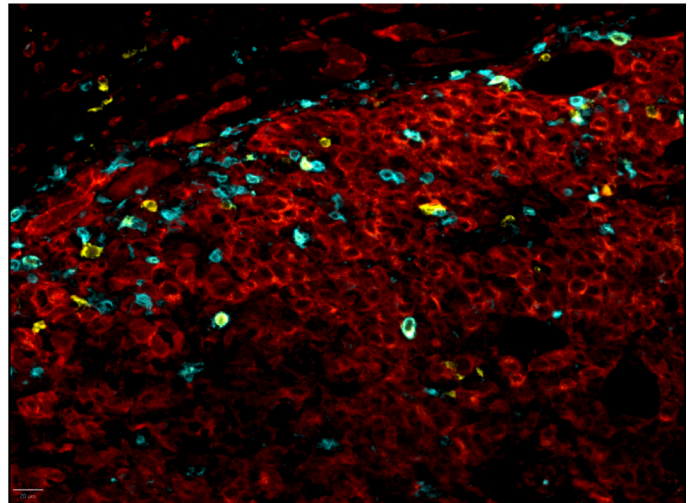

**Figure S1A. Control tumor immunohistochemistry.** Representative images. Images of individual fluorescent channels corresponding to IHC images shown in Figure 2A. For details, see Materials and Methods.

**A. Melan-A**

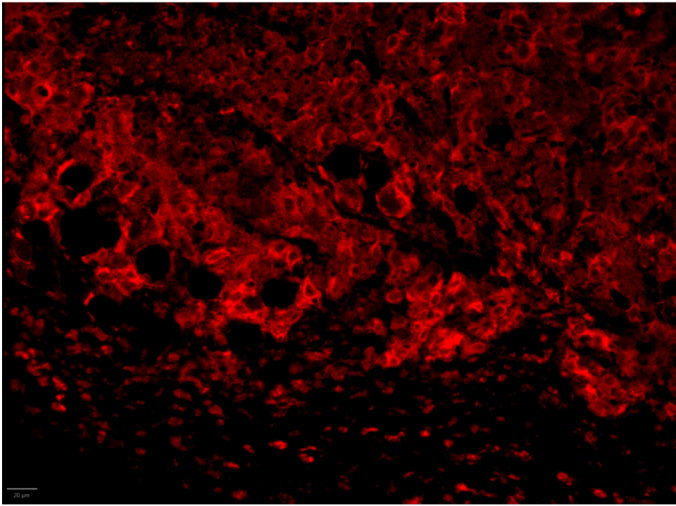

**B. CD8a**

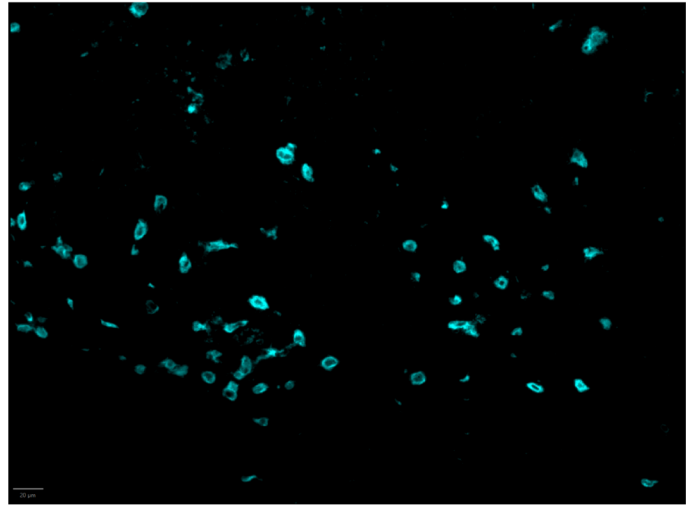

**C. PD-1**

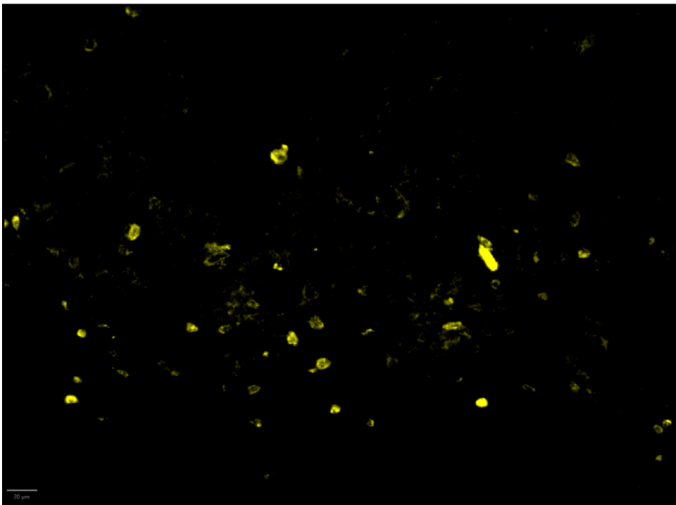

**D. Composite**

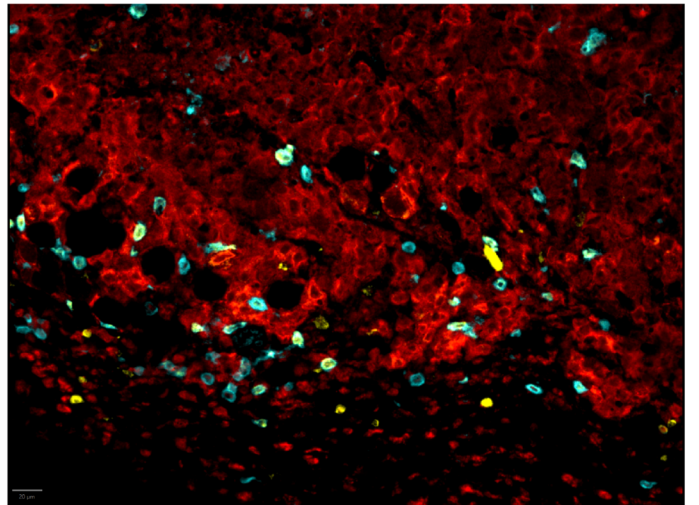

**Figure S1B. pPD1N+EP tumor immunohistochemistry.** Representative images. Images of individual fluorescent channels corresponding to IHC images shown in Figure 2B. For details, see Materials and Methods.

**A. Melan-A**

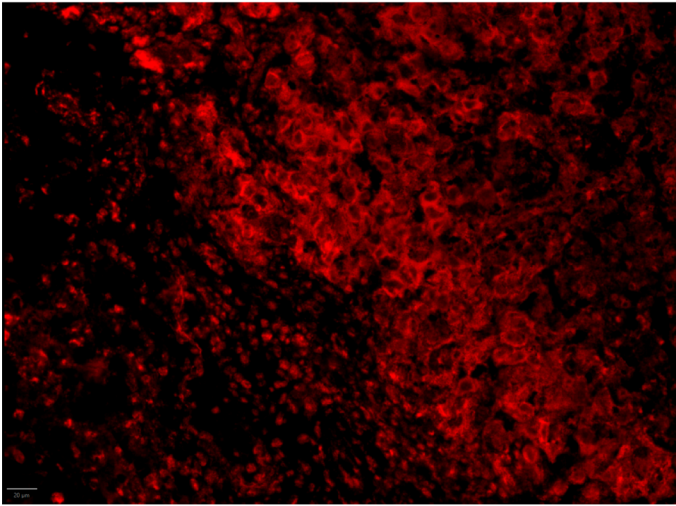

**B. CD8a**

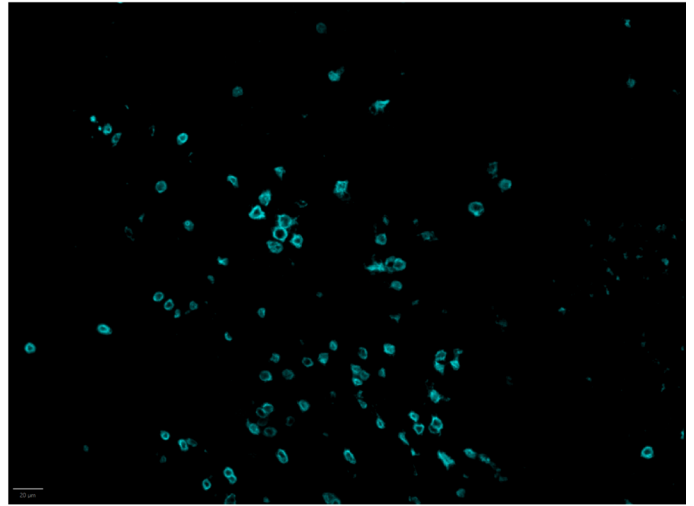

**C. PD-1**

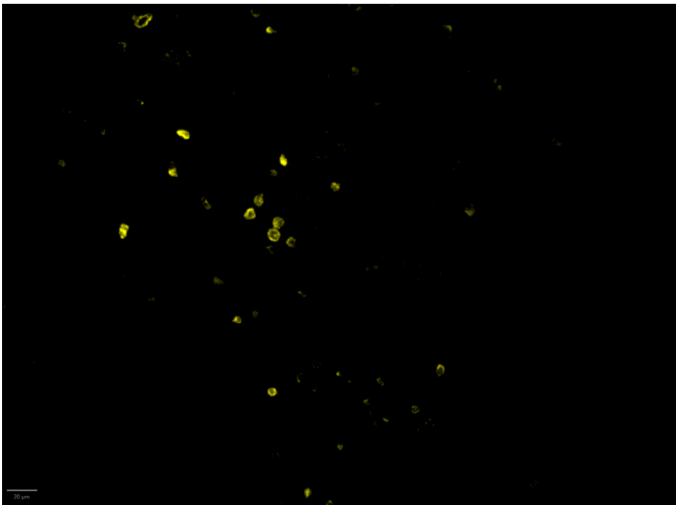

**D. Composite**

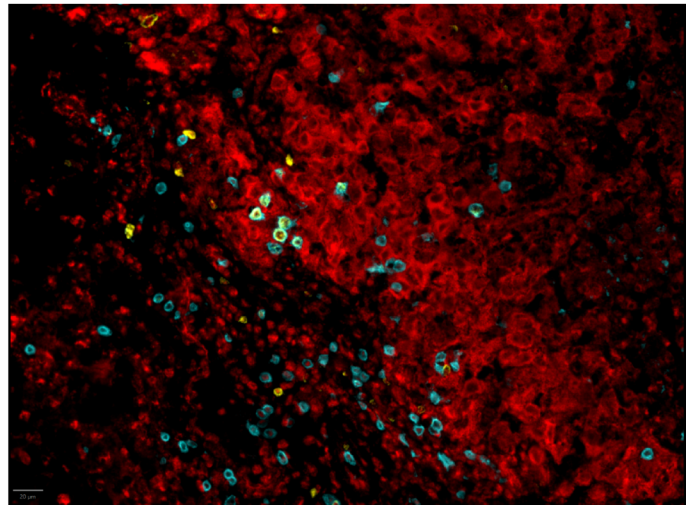

**Figure S1C. pPD1P+EP tumor immunohistochemistry.** Representative images. Images of individual fluorescent channels corresponding to IHC images shown in Figure 2C. For details, see Materials and Methods.

## PD-1

### Control

CD45+ (n=3)

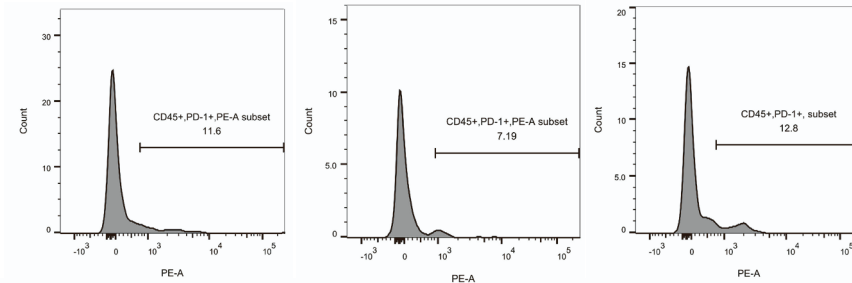

CD45- (n=3)

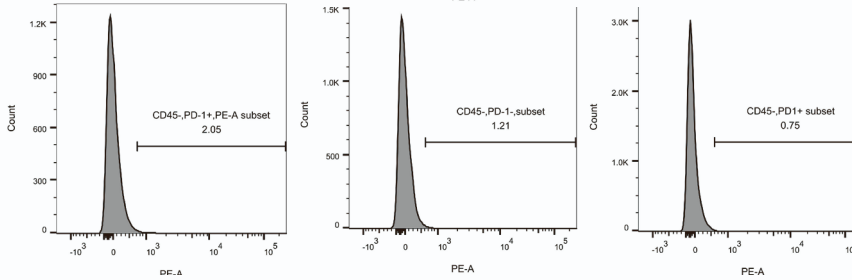

### PD1N+EP

CD45+ (n=4)

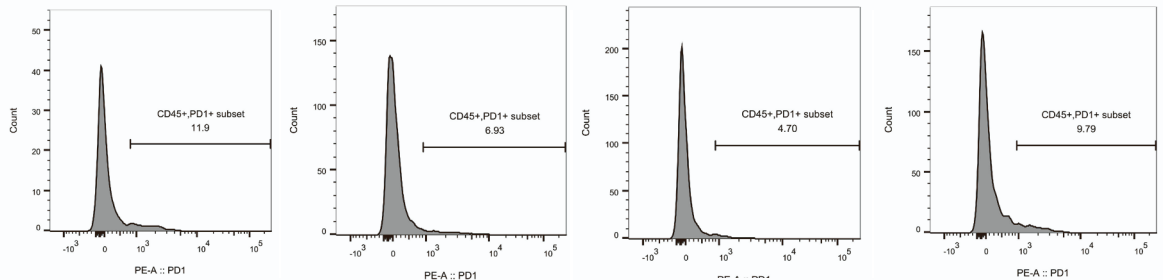

CD45- (n=4)

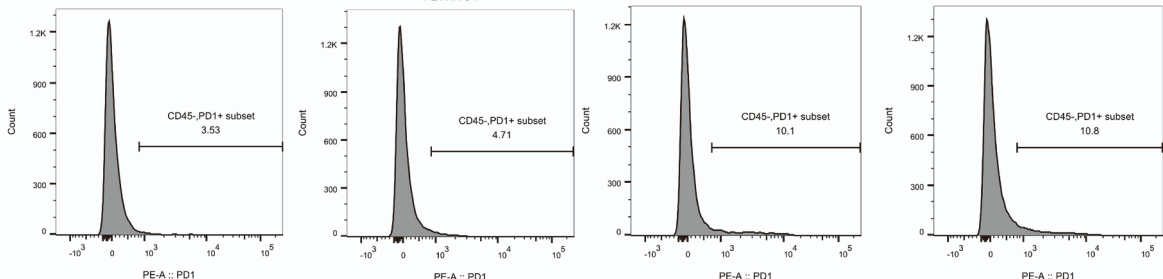

### PD1P+EP

CD45+ (n=3)

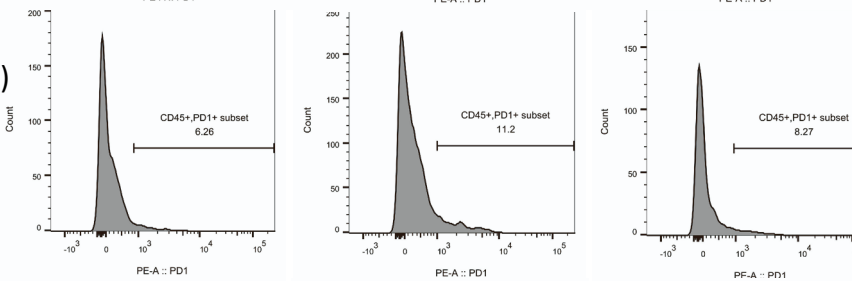

CD45- (n=3)

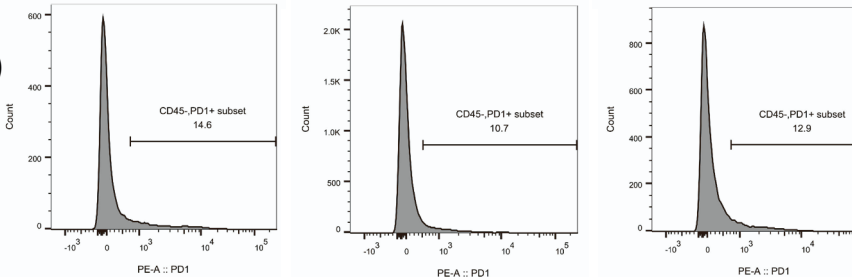

**Figure S2. Individual flow cytometry histograms of cells isolated from tumors. PD1N, PD1P, plasmids encoding these peptides; EP, electroporation. See also methods and Figure 2.**
